# Supplementary material for: Aluminium fluorescence detection with a FRET amplified chemosensorElectronic supplementary information (ESI) available: experimental details and spectra. See http://www.rsc.org/suppdata/cc/b3/b303195k/
Source: Royal Society of Chemistry journal article supplement (doi:10.1039/b303195k), 2003-01-01
Supplement: b303195k.doc [file b303195k.doc]

## Supplementary Information

Aluminium fluorescence detection with a FRET amplified chemosensor

Maria Arduini,*a* Fulvia Felluga,*b* Fabrizio Mancin,*a* Paola Rossi,*b* Paolo Tecilla,*,*b* Umberto Tonellato*,*a*,and Nicola Valentinuzzi*b*

aDipartimento di Chimica Organica and Istituto CNR di Tecnologia delle Membrane - Sezione di Padova, Università di Padova, via Marzolo 1, I -35131 Padova, Italy. Fax: +39 0498275239; Tel: +39 0498275269; E-mail: umberto.tonellato@unipd.it

bDipartimento di Scienze Chimiche,Università di Trieste, via Giorgieri 1, I-34127, Italy. Fax: +39 0405583903; Tel:+39 0405583925; E-mail: tecilla@dsch.univ.trieste.it

(Total 8 pages including this cover page)

#### Table of Contents

1. Experimental Procedures 2

2. Synthesis of compounds **1**, **3** and **4**. 3

3. UV-Visible titration of ligand **3** with Al3+ (**Figure S1**) 6

4. UV-Visible titration of compound **1** with Al3+ (**Figure S2**) 6

5. UV-Visible spectra of ligand **3** at increasing pH values (**Figure S3 and S4**) 7

6. Fluorescence emission spectra of sensor **1** and

coumarin amide **4** (**Figure S5**) 8

7. Fluorescence response of compounds **1** to Al3+ in the presence

of other metal ions (**Figure S6**) 7

**1. Experimental Procedures.**

**General:** 1H NMR spectra were run on a Jeol EX-400 instrument. Chemical shifts are reported relative to internal Me4Si. Multiplicity is given as usual. ESI-MS spectra were obtained on a PE-API spectrometer at 5600 volts by infusion of methanolic solutions. UV-Vis absorption measurements were performed on a Perkin Elmer Lambda 16 spectrophotometer equipped with a thermostated cell holder. Fluorescence spectra were recorded on a Perkin Elmer LS-50B spectrometer equipped with a thermostated cell holder. TLC’s were performed on Polygram® Sil G/UV254 silica gel pre-coated plastic sheets. Flash chromatography was run on silica gel, 230-400 mesh ASTM (Kieselgel 60, Merck). Solvents were purified under standard techniques. Reagents were purchased by Aldrich and used as received. Al(NO3)3, Cu(NO3)2, Zn(NO3)2, Ni(NO3)2, FeCl3, CaCl2, MgCl2 were analytical grade products. Metal ion stock solutions were titrated against EDTA following standard procedures. 4-[3,5-bis-(2-hydroxyphenyl)-1,2,4-triazol-1-yl]-benzoic acid[[1]](#footnote-2) (**2**), N-BOC-1,2-diaminoethane[[2]](#footnote-3) (**5**) were prepared by known procedures.

**Spectrometric titrations:** Several 2-mL solutions of buffer (1·10-2 M), ligands **1** or **3** (3.11·10-6 M in the case of fluorescence experiments or 0.9-1.6·10-5 M in the case of the absorption experiments) and the desired amount of metal salt solution in water/ethanol 1:1 were prepared in plastic fluorescence cuvettes and incubated at 25° C for 12 hours. Complex formation was monitored following the absorption spectral changes. UV-Vis or fluorescence spectra were then recorded. From the spectral changes observed upon addition of the substrate, the Kapp values were obtained by non-linear regression analyses of fluorescence data (at the selected wavelength) versus metal ion concentrations. The buffer used in the experiments was acetate buffer 0.01 M at pH 4.0. After mixing with ethanol the pH value read with the pH-meter was 5.0.

**2. Synthesis**

**2.1 Synthesis of derivative 1**

A CH2Cl2 solution of HOBt (0.36g, 2.7 mmol) was added at r.t. to a solution of **2** (4-[3,5-bis-(2-hydroxyphenyl)-1,2,4-triazol-1-yl]-benzoic acid) (1g, 2.7 mmol) in 10 ml anhydrous DMF. After cooling down the solution to 0°C, EDC (0.062g, 3.2 mmol) was added, the mixture stirred for further 10 min at r.t., then a solution of **5** (mono tbutyloxycarbonyl-1,2-ethylenediamine) (0.43g, 2.7 mmol) and Et3N (0.4ml, 3.2 mmol) in 10ml CH2Cl2 was added dropwise. The mixture was left on stirring, monitoring the course of the reaction by TLC (CHCl3:EtOH 15:1). After 18h, the solution was diluted with CH2Cl2 (20ml), washed with 5% citric acid (3x) and water (5x). The combined organic layers were dried (Na2SO4), the solvent removed *in vacuo*, and the crude material was purified by FC (eluent: toluene-ethyl acetate 7:3) to give the product **6**, 0.260g, yield 19%.

1H-NMR (400 MHz, MeOD) : 1.49 (s, 9H), 3.34 (t, 2H), 3.52 (t, 2H), 6.91 (d, 1H, J=8.0 Hz), 7.06 (m, 3H), 7.44 (m, 2H), 7.56 (dd, 1H, J = 7.7, 1.5 Hz), 7.62, 7.95 (AB quartet, 4H), 8.19 (dd, 1H, J 7.7, 1.5 Hz). ESI-MS calcd for C28H29N5O5 (M+): 515; obsd: 538 (M+ + Na+).

A solution of above Boc-protected derivative, (0.260g, 0.5 mmol) and TFA (10 ml) in CH2Cl2 (10ml) was stirred 1h at r.t. Evaporation of the solvent to dryness left a residue (product **6**) which was used without further purification. 1H-NMR (400 MHz, MeOD), : 3.25 (t, 2H), 3.75 (t, 2H), 6.93 (d, 1H J = 8.4 Hz), 7.07 (m, 3H), 7.44 (m, 2H), 7.54 (dd, 1H J=7.3,1.5 Hz), 7.65, 8.00 (AB quartet, 4H), 8.18 (dd, 1H , J=7.7, 1.5 Hz). ESI-MS calcd for C23H21N5O3 (M+): 415; obsd: 438 (M+ + Na+).

Oxalylchloride (0.1 ml) and DMF (10 l) were added under Ar to a CH2Cl2 solution (10 ml) of Coumarin 343 (0.050 g 0.17 mmol). The solution was stirred at r.t. 1h, then the solvent was removed *in vacuo*. The resulting acid chloride **7**[[3]](#footnote-4)(0.050g, 0.16 mmol), dissolved in 10 ml CH2Cl2, was dropwise added to a solution of **6** (0.086 g , 0.16 mmol) and Et3N (0.075 ml, 0.52 mmol) in the same solvent. After sirring at room temperature 18h, the solution was extracted with H2O, the organic phase dried and the solvent evaporated *in vacuo*. Purification by flash chromatography (CH2Cl2/MeOH 10:1) gave the product **1**, 0.075 g, 67% yield.

1H-NMR (400 MHz, CDCl3): 1.97 (m, 4H) 2.76 (t, 2H), 2.89 (t, 2H), 3.34 (m, 4H), 3.71 (bt, 2H), 3.76 (bt, 2H), 6.65 (t, 1H), 6.94 (dd, 1H J = 8.0, 1.5 Hz), 7.00 (s, 1H), 7.06 (d, J = 8.0 Hz, 1H), 7.08 (d, J = 8.04 Hz, 1H), 7.14 (d, J = 7.7 Hz, 1H), 7.33 (m, 1H), 7.38 (m, 1H), 7.60, 8.10 (AB quartet, 4H), 8.14 (dd, 1H, J=8.0, 1.8 Hz), 8.38 (bt, 1H), 8.61 (s, 1H), 9.38 (t, 1H), 9.64 (s, 1H), 11.44 (s, 1H). ESI-MS calcd for C39H34N6O6 (M+): 682; obsd: 705 (M+ + Na+).

**2.2 Synthesis of ligand derivative 3**

**2** (60 mg, 0.16 mmol) was suspended in 4 ml of CHCl3, triethylamine (0.10 mL, 0.72 mmol) and hydroxybenzotriazole (58 mg, 0.43 mmol) were added and the reaction mixture was cooled to 0° C. Then EDC·HCl (80 mg, 0.42 mmol) was added and, after 10 minutes, *n*-propylamine (0.020 mL, 0.47 mmol). The reaction mixture was stirred at 0° C for 1 hour and at room temperature overnight. After this time, 100 mL of CH2Cl2 were added and the mixture was extracted with a 5% KHSO4 solution (2x), a 5% NaHCO3 solution (2x) and water (2x). The organic phase was dried (NaSO4) and the solvent removed to yield 62 mg (94%) of **3** as a white solid.

1H NMR (CDCl3) : 1.03 (t, *J* = 7.2 Hz, 3H), 1.68 (m, *2* H), 3.47 (t, *J* = 6.3 Hz, 2H), 6.2 (bs, 1H), 6.6 (t, *J* = 7.0 Hz, 1H), 7.4-6.9 (m, 6H), 7.60 (d, *J* = 8.1 Hz, 2H), 7.96 (d, *J* = 8.1 Hz, 2H), 8.16 (d, *J* = 7.0 Hz, 1H). ESI-MS calcd for C24H22N4O3 (M+): 414; obsd: 437 (M+ + Na+).

**2.2 Synthesis of coumarine derivative 4**

Coumarin 343 (30 mg, 0.11 mmol), triethylamine (0.70 mL, 0.49 mmol) and hydroxybenzotriazole (43 mg, 0.32 mmol) were dissolved in 2 ml of CHCl3 and the reaction mixture was cooled to 0° C. Then EDC·HCl (64 mg, 0.32 mmol) was added and, after 10 minutes, *n*-propylamine (0.014 mL, 0.32 mmol). The reaction mixture was stirred at 0° C for 1 hour and at room temperature overnight. After this time, 100 mL of CH2Cl2 were added and the mixture was extracted with a 5% KHSO4 solution (2x), a 5% NaHCO3 solution (2x) and water (2x). The organic phase was dried (Na2SO4) and the solvent removed. The crude product was purified by flash column chromatography (silica gel, CH2Cl2/CH3OH 20:1) to yield 35 mg (97%) of **4** as a white solid.

1H NMR (CDCl3) : 0.97 (t, *J* = 7.5 Hz, 3H), 1.62 (m, *2* H), 1.96 (m, 4H), 2.76 (t, *J* = 6.3 Hz, 2H), 2.87 (t, *J* = 6.5 Hz, 2H), 3.3-3.4 (m, 6H), 7.03 (s, 1H), 8.64 (s, 1H), 9.04 (bs, 1H). ESI-MS calcd for C19H22N2O3 (M+): 326; obsd: 349 (M+ + Na+).

**3. UV-Visible titration of ligand 3 with Al3+**

**Figure S1:** UV-Visible spectra of ligand **3** in the presence of increasing amounts of Al(NO3)3 in EtOH/H2O (1/1) at pH= 5.0. [**3**]= 8.7x10-6 M, [acetate buffer] = 0.01M.

**4. UV-Visible titration of compound 1 with Al3+**

**Figure S2:** UV-Visible spectra of compound **1** in the presence of increasing amounts of Al(NO3)3 in EtOH/H2O (1/1) at pH= 5.0. [**1**]= 1.65x10-5 M, [acetate buffer] = 0.01M.

**5. UV-Visible spectra of ligand 3 at increasing pH values**

**Figure S3:** UV-Visible spectra of ligand **3** (1.74·10-5 M) at increasing pH values in the range 7-12 in EtOH/H2O 1:1.

**Figure S4:** UV-Visible spectra of ligand **3** (1.74·10-5 M) at increasing pH values in the range 12-13.9 in EtOH/H2O 1:1.

**Figure S5:** Fluorescence emission spectra exc= 445 nm) of sensor **1** (upper curve) and coumarin derivative **4** (lower curve) in ethanol. [**1**] = [**4**] = 3.11·10-6 M.

**Figure S6:** Fluorescence response of chemosensor **1** to Al3+ in the presence of other metal ions. Conditions: EtOH/H2O (1/1), pH= 5.0. [**1**]= 3.0x10-6 M, [acetate buffer] = 0.01M.

1. R.Lattmann, P.Acklin (Novartis AG), WO-A 9749395A1 1997 [Chem.Abstr. 1998, **128**, 114953e] [↑](#footnote-ref-2)
2. P.Krapcho, C.S.Kuell, *Synth.Commun*. 1990, **20**, 2559-2564. [↑](#footnote-ref-3)
3. J Gompel, G.Schuster, *J.Org.Chem.* 1987, **52**, 1465-1468. [↑](#footnote-ref-4)
